# Supplementary material for: Structure and chemistry of graphene oxide in liquid water from first principles
Source: PubMed Central journal article supplement (PMC7099009; doi:10.1038/s41467-020-15381-y), 2020-03-26
Supplement: 41467_2020_15381_MOESM3_ESM.pdf [file 41467_2020_15381_MOESM3_ESM.pdf]

## Description of Additional Supplementary Files

File name: Supplementary movie 1

Description: Movie showing several proton exchanges between the surface hydroxyl groups and the surrounding H<sub>2</sub>O molecules present in the bulk.

File name: Supplementary movie 2

Description: Movie showing the dehydration reaction that is observed in the trajectory of the semi-ordered 4 graphene oxide model in liquid water.
